# Supplementary material
Source: PubMed Central journal article supplement (PMC6220706)
Supplement: 10-4338-aci-2016-12-ra-0210-supp1.pdf [file 10-4338-aci-2016-12-ra-0210-supp1.pdf]

DATA SET: d4 LABEL: DATE CREATED: 01NOV16:12:14:37

Number of Observations: 2152

Number of Variables: 35

Organization of file: One Record per Problem List item\*patient (ID)

| Variable Name                   | Variable Label (VAR)            | VAR Type | VAR Format | VAR Length | Mean     | Range of Values | Frequency Category               | Frequency | Percent |
|---------------------------------|---------------------------------|----------|------------|------------|----------|-----------------|----------------------------------|-----------|---------|
| ANNOTATED                       | Annotation added                | Num      |            | 8          | 1        | 1.00-1.00       |                                  | 2152      | 100.00  |
| CERTAINTY                       | Certainty                       | Num      |            | 8          | 8.241171 | 2.00-10.00      |                                  | 2152      | 100.00  |
| CHANGE_DUE_TO_IRR_              | Change due to IRR               | Char     | \$         | 1          |          | .-.             |                                  |           |         |
| CHANGE_MADE_DUE_TO_HUMAN_ERROR_ | Change made due to human error? | Char     | \$         | 1          |          | .-.             |                                  |           |         |
| COMPLETE                        | Whether complete                | Char     | \$         | 3          |          | .-.             |                                  |           |         |
| DIAGNOSIS_NAME                  |                                 | Char     | \$DX       | 5          |          | ADA             | Alcohol/Drug Abuse               | 163       | 7.57    |
|                                 |                                 |          |            |            |          | ADHD            | Attention Def/Hyperact. Disorder | 46        | 2.14    |
|                                 |                                 |          |            |            |          | asthm           | Asthma                           | 359       | 16.68   |
|                                 |                                 |          |            |            |          | Breas           | Breast Cancer                    | 38        | 1.77    |
|                                 |                                 |          |            |            |          | cad             | Coronary Art. Disease            | 151       | 7.02    |
|                                 |                                 |          |            |            |          | chf             |                                  | 103       | 4.79    |
|                                 |                                 |          |            |            |          | CHF             | CHF                              | 12        | 0.56    |
|                                 |                                 |          |            |            |          | ckd             | Chronic Kidney Disease           | 158       | 7.34    |
|                                 |                                 |          |            |            |          | CKD             | Chronic Kidney Disease           | 158       | 7.34    |
|                                 |                                 |          |            |            |          | COPD            |                                  | 116       | 5.39    |
|                                 |                                 |          |            |            |          | CVA             | Ischemic Stroke                  | 72        | 3.35    |
|                                 |                                 |          |            |            |          | Dep             | Depression                       | 441       | 20.49   |
|                                 |                                 |          |            |            |          | DMnoC           | Diabetes wo comp                 | 260       | 12.08   |

DATA SET: d4 LABEL: DATE CREATED: 01NOV16:12:14:37

Number of Observations: 2152

Number of Variables: 35

Organization of file: One Record per Problem List item\*patient (ID)

| Variable Name         | Variable Label (VAR)        | VAR Type | VAR Format | VAR Length | Mean      | Range of Values   | Frequency Category | Frequency | Percent |
|-----------------------|-----------------------------|----------|------------|------------|-----------|-------------------|--------------------|-----------|---------|
|                       |                             |          |            |            |           | DMwC              | DM with comp       | 101       | 4.69    |
|                       |                             |          |            |            |           | hiv               | HIV                | 132       | 6.13    |
|                       |                             |          |            |            |           | HIV               | HIV                | 132       | 6.13    |
| DTE_LASTCLAIM         | Date of latest claim        | Num      | MMDDYY     | 8          | 01/07/12  | 03/20/10-03/01/13 |                    | 2152      | 100.00  |
| E                     | Encounter EHR signal        | Char     |            | 1          |           | .-.               |                    |           |         |
| ENC                   | Enc GS review               | Char     | \$         | 8          |           | .-.               |                    |           |         |
| ENCOUNTERDATE         |                             | Num      | MMDDYY     | 8          | 03/06/10  | 03/25/08-01/16/12 |                    | 2122      | 98.61   |
| ERROR                 | Error found in GS           | Char     | \$         | 4          |           | .-.               |                    |           |         |
| FALSE_POSITIVES       | False + / decoy             | Char     | \$         | 1          |           | .-.               |                    |           |         |
| FIRSTDATE_AMBPROBLIST |                             | Num      | MMDDYY     | 8          | 04/18/08  | 11/11/67-01/12/12 |                    | 730       | 33.92   |
| FIRSTDATE_ENCDX       |                             | Num      | MMDDYY     | 8          | 05/19/10  | 04/21/08-01/26/12 |                    | 931       | 43.26   |
| FIRSTDATE_HOSPADMDX   |                             | Num      | MMDDYY     | 8          | 07/14/10  | 05/23/08-04/13/12 |                    | 223       | 10.36   |
| HAS                   | Has                         | Char     | \$         | 8          |           | .-.               |                    |           |         |
| HOSPADMIT             | Hosp Admit dx GS review     | Char     | \$         | 8          |           | .-.               |                    |           |         |
| HOSPPATE              | deid Hospital Date          | Num      | DATE       | 8          | 18491.861 | 17741.00-19096.00 |                    | 223       | 10.36   |
| HOSPPDC               | Hosp Discharge dx GS review | Char     | \$         | 8          |           | .-.               |                    |           |         |

DATA SET: d4 LABEL: DATE CREATED: 01NOV16:12:14:37

Number of Observations: 2152

Number of Variables: 35

Organization of file: One Record per Problem List item\*patient (ID)

| Variable Name  | Variable Label (VAR)          | VAR Type | VAR Format | VAR Length | Mean       | Range of Values    | Frequency Category | Frequency | Percent |
|----------------|-------------------------------|----------|------------|------------|------------|--------------------|--------------------|-----------|---------|
| IRR            | Inter-rater reliability score | Char     | \$         | 1          |            | .-.                |                    |           |         |
| M              | MedHistory EHR signal         | Char     |            | 1          |            | .-.                |                    |           |         |
| MEDHX          | Med History GS review         | Char     | \$         | 8          |            | .-.                |                    |           |         |
| NOTFOUNDREASON | HAS = NO reason               | Char     | \$         | 72         |            | .-.                |                    |           |         |
| NUM_DIAGNOSES  | # of times diagnosis found    | Num      |            | 8          | 3.94847775 | 1.00-71.00         |                    | 1708      | 79.37   |
| NUM_ENCDX      | # of times dx in encounters   | Num      |            | 8          | 5.1544477  | 0.00-58.00         |                    | 1023      | 47.54   |
| NUM_HOSPDY     | # of times hosp dx found      | Num      |            | 8          | 0.45063539 | 0.00-13.00         |                    | 1023      | 47.54   |
| OTHERDX        | Diagnosis found elsewhere     | Char     | \$         | 40         |            | .-.                |                    |           |         |
| PATIENT_ID     | Deid patient ID               | Num      |            | 8          | 89143.1701 | 60385.00-189710.00 |                    | 2152      | 100.00  |
| PL             | Problem List EHR Signal       | Char     |            | 1          |            | .-.                |                    |           |         |
| PROBLIST       | Problem List GS review        | Char     | \$         | 8          |            | .-.                |                    |           |         |
| PTDX_ID        | DEID Primary key              | Num      |            | 8          | 1404.43913 | 2.00-2800.00       |                    | 2152      | 100.00  |

DATA SET: d4 LABEL: DATE CREATED: 01NOV16:12:14:37

Number of Observations: 2152

Number of Variables: 35

Organization of file: One Record per Problem List item\*patient (ID)

| Variable Name | Variable Label (VAR) | VAR Type | VAR Format | VAR Length | Mean       | Range of Values | Frequency Category | Frequency | Percent |
|---------------|----------------------|----------|------------|------------|------------|-----------------|--------------------|-----------|---------|
| R             | Rule EHR signal      | Char     |            | 1          |            | .-.             |                    |           |         |
| RULE          | actual rule fired    | Char     |            | 306        |            | .-.             |                    |           |         |
| RULECHK       | Rule GS review       | Char     | \$         | 8          |            | .-.             |                    |           |         |
| TRUE_NEGATIVE |                      | Num      |            | 8          | 0.95771375 | 0.00-1.00       |                    | 2152      | 100.00  |

| Obs | warning                                  | Variable Name | VAR Format | Frequency Category |
|-----|------------------------------------------|---------------|------------|--------------------|
| 1   | All Non-Missing values are the same for: | ANNOTATED     |            |                    |
